# Supplementary material
Source: PubMed Central journal article supplement (PMC3973137)
Supplement: 13238_2014_24_MOESM1_ESM.pdf [file 13238_2014_24_MOESM1_ESM.pdf]

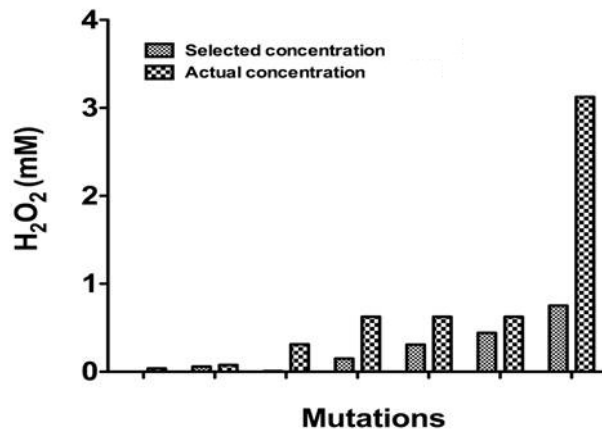

Figure S1. MIC of H<sub>2</sub>O<sub>2</sub> in resistant mutants of *M. smegmatis*. The actually MICs of H<sub>2</sub>O<sub>2</sub> in different mutants was compared with the corresponding selected indicated H<sub>2</sub>O<sub>2</sub> concentration.
