# Supplementary material
Source: PubMed Central journal article supplement (PMC3973137)
Supplement: 13238_2014_24_MOESM2_ESM.pdf [file 13238_2014_24_MOESM2_ESM.pdf]

Table S1. The MICs of anti-TB drugs of mc<sup>2</sup>51 and mc<sup>2</sup>155;

| MIC                 | INH<br>(mg/L) | H <sub>2</sub> O <sub>2</sub><br>(mM) | STR<br>(mg/L) | EMB<br>(mg/L) | RFP<br>(mg/L) | CIP<br>(mg/L) | Kan<br>(mg/L) | Amp<br>(mg/L) |
|---------------------|---------------|---------------------------------------|---------------|---------------|---------------|---------------|---------------|---------------|
| mc <sup>2</sup> 155 | 10            | 0.05                                  | 0.25          | 0.25          | 5             | 0.125         | 0.625         | 31.25         |
| mc <sup>2</sup> 51  | 0.1           | 2.5                                   | 0.25          | 0.25          | 5             | 0.125         | 0.625         | 125           |

Table S2. Mutations identified in mc<sup>2</sup>51;

| Mutation position | Gene              | Protein                                           | Reference nucleotide | Substitute nucleotide | Reference amino acid | Substitute amino acid |
|-------------------|-------------------|---------------------------------------------------|----------------------|-----------------------|----------------------|-----------------------|
| <b>185148</b>     | <b>MSMEG_0161</b> | <b>formate dehydrogenase subunit alpha</b>        | <b>G</b>             | <b>A</b>              | <b>Cys</b>           | <b>Tyr</b>            |
| <b>272276</b>     | <b>MSMEG_0241</b> | <b>MmpL11</b>                                     | <b>A</b>             | <b>T</b>              | <b>Tyr</b>           | <b>Stop</b>           |
| <b>934523</b>     | <b>MSMEG_0850</b> | <b>hypothetical protein</b>                       | <b>C</b>             | <b>T</b>              | <b>Ala</b>           | <b>Val</b>            |
| 1475729           | MSMEG_1375        | tagatose-1,6-bisphosphate aldolase, GatY          | G                    | A                     | -                    | -                     |
| 1693605           | MSMEG_1606        | benzoylformate decarboxylase                      | C                    | T                     | -                    | -                     |
| <b>3501569</b>    | <b>MSMEG_3430</b> | <b>SAM-dependent methyltransferase</b>            | <b>G</b>             | <b>A</b>              | <b>Asp</b>           | <b>Asn</b>            |
| 3526423           |                   |                                                   | C                    | T                     |                      |                       |
| <b>3526518</b>    | <b>MSMEG_3460</b> | <b>ferric uptake regulation protein, FurB</b>     | <b>C</b>             | <b>T</b>              | <b>Ala</b>           | <b>Val</b>            |
| <b>3667399</b>    | <b>MSMEG_3603</b> | <b>oxidoreductase, zinc-binding dehydrogenase</b> | <b>G</b>             | <b>A</b>              | <b>Ala</b>           | <b>Val</b>            |
| <b>3919450</b>    | <b>MSMEG_3847</b> | <b>tyramine oxidase, TynA</b>                     | <b>G</b>             | <b>T</b>              | <b>Cys</b>           | <b>Stop</b>           |
| 4212322           |                   |                                                   | C                    | A                     |                      |                       |
| 4214321           | MSMEG_4134        | pseudogene                                        | G                    | T                     |                      |                       |
| 4214326           | MSMEG_4134        | pseudogene                                        | C                    | A                     |                      |                       |
| 4214347           | MSMEG_4134        | pseudogene                                        | A                    | C                     |                      |                       |
| 5118221           | MSMEG_5021        | alcohol dehydrogenase                             | G                    | A                     | -                    | -                     |
| <b>5141995</b>    | <b>MSMEG_5044</b> | <b>ATPase</b>                                     | <b>G</b>             | <b>T</b>              | <b>Ser</b>           | <b>Ile</b>            |
| <b>5295214</b>    | <b>MSMEG_5197</b> | <b>long-chain specific acyl-CoA dehydrogenase</b> | <b>T</b>             | <b>C</b>              | <b>Asp</b>           | <b>Gly</b>            |
| 5584311           |                   |                                                   | A                    | C                     |                      |                       |
| <b>5953123</b>    | <b>MSMEG_5893</b> | <b>hypothetical protein</b>                       | <b>G</b>             | <b>C</b>              | <b>Gln</b>           | <b>Glu</b>            |
| <b>5979886</b>    | <b>MSMEG_5920</b> | <b>FMN-dependent monooxygenase</b>                | <b>T</b>             | <b>C</b>              | <b>Asp</b>           | <b>Ala</b>            |
| <b>6915055</b>    | <b>MSMEG_6866</b> | <b>peptide ABC transporter permease</b>           | <b>C</b>             | <b>A</b>              | <b>Ala</b>           | <b>Glu</b>            |
| 6915059           | MSMEG_6866        | peptide ABC transporter permease                  | G                    | T                     | -                    | -                     |

Table S3. The effects of Fur overexpression on the INH and H<sub>2</sub>O<sub>2</sub> resistance in mc<sup>2</sup>51.

| MIC                                | mc <sup>2</sup> 155 | mc <sup>2</sup> 51 |              |            |
|------------------------------------|---------------------|--------------------|--------------|------------|
|                                    | pMV361              | pMV361             | pMV361-L-fur | pMV361-fur |
| H <sub>2</sub> O <sub>2</sub> (mM) | <0.0244             | 3.125              | 0.3906       | 0.3906     |
| INH(mg/L)                          | 6.25                | 0.0195             | 0.3906       | 1.526      |

Table S4. Strains and Plasmids used in this study

| Name                                          | Relevant genotype or description                                                                          | Reference   |
|-----------------------------------------------|-----------------------------------------------------------------------------------------------------------|-------------|
| <b>Strains</b>                                |                                                                                                           |             |
| <i>M. smegmatis</i>                           |                                                                                                           |             |
| mc <sup>2</sup> 155                           | wild type                                                                                                 | W.R. Jacobs |
| mc <sup>2</sup> 51                            | An high H <sub>2</sub> O <sub>2</sub> resistance strain                                                   | This work   |
| mc <sup>2</sup> 155<br>(pMV261)               | mc <sup>2</sup> 155 containing pMV261 vector                                                              | This work   |
| mc <sup>2</sup> 155<br>(pMV361)               | mc <sup>2</sup> 155 integrating pMV361 vector                                                             | This work   |
| mc <sup>2</sup> 51<br>(pMV261)                | mc <sup>2</sup> 51 containing pMV261 vector                                                               | This work   |
| mc <sup>2</sup> 51<br>(pMV361)                | mc <sup>2</sup> 51 integrating pMV361 vector                                                              | This work   |
| mc <sup>2</sup> 51<br>(pMV361-L- <i>fur</i> ) | mc <sup>2</sup> 51 integrating pMV361-L- <i>fur</i> vector                                                | This work   |
| mc <sup>2</sup> 51<br>(pMV361- <i>fur</i> )   | mc <sup>2</sup> 51 integrating pMV361 - <i>fur</i> vector                                                 | This work   |
| <i>E. coli</i>                                |                                                                                                           |             |
| DH5α                                          | F <sup>-</sup> recA1 hsdR17 thi-1 gyrA96 supE44 endA1relA1 recA1<br>deoR Δ(lacZYA-argF)U169 (φ80lacZΔM15) |             |
| <b>Plasmids</b>                               |                                                                                                           |             |
| pMV261                                        | Mycobacterial extrachromosomal expression vector, Km <sup>R</sup>                                         | (1)         |
| pMV361                                        | Mycobacterial integrative expression vector, Km <sup>R</sup>                                              | (1)         |
| pMV361-L- <i>fur</i>                          | pMV361 containing full sequence of <i>fur</i> and its 39 nt<br>5'-UTR, Km <sup>R</sup>                    | This work   |
| pMV361- <i>fur</i>                            | pMV361 containing full sequence of <i>fur</i> , Km <sup>R</sup>                                           | This work   |

(1) Stover,C.K., de la Cruz,V.F., Fuerst,T.R., Burlein,J.E., Benson,L.A., Bennett,L.T., Bansal,G.P., Young,J.F., Lee,M.H., Hatfull,G.F. et al. (1991) New use of BCG for recombinant vaccines. Nature, 351, 456–460



---

|              |                                                      |
|--------------|------------------------------------------------------|
| Msmeg5920mvR | GCTGAAGCTTAGTGGTGATGGTGATGGTGCAGCAG<br>CGCGGCGAGTTC  |
| Msmeg6866mvF | GCCTCAATTGCGCATATGGCGATGACTGACCTGTTG                 |
| Msmeg6866mvR | GCTGAAGCTTAGTGGTGATGGTGATGGTGTCGGCC<br>GAGCCTCACTCTC |

---
